2023 | VOLUME 76 | NUMBER 1

# The American Journal of Psychotherapy

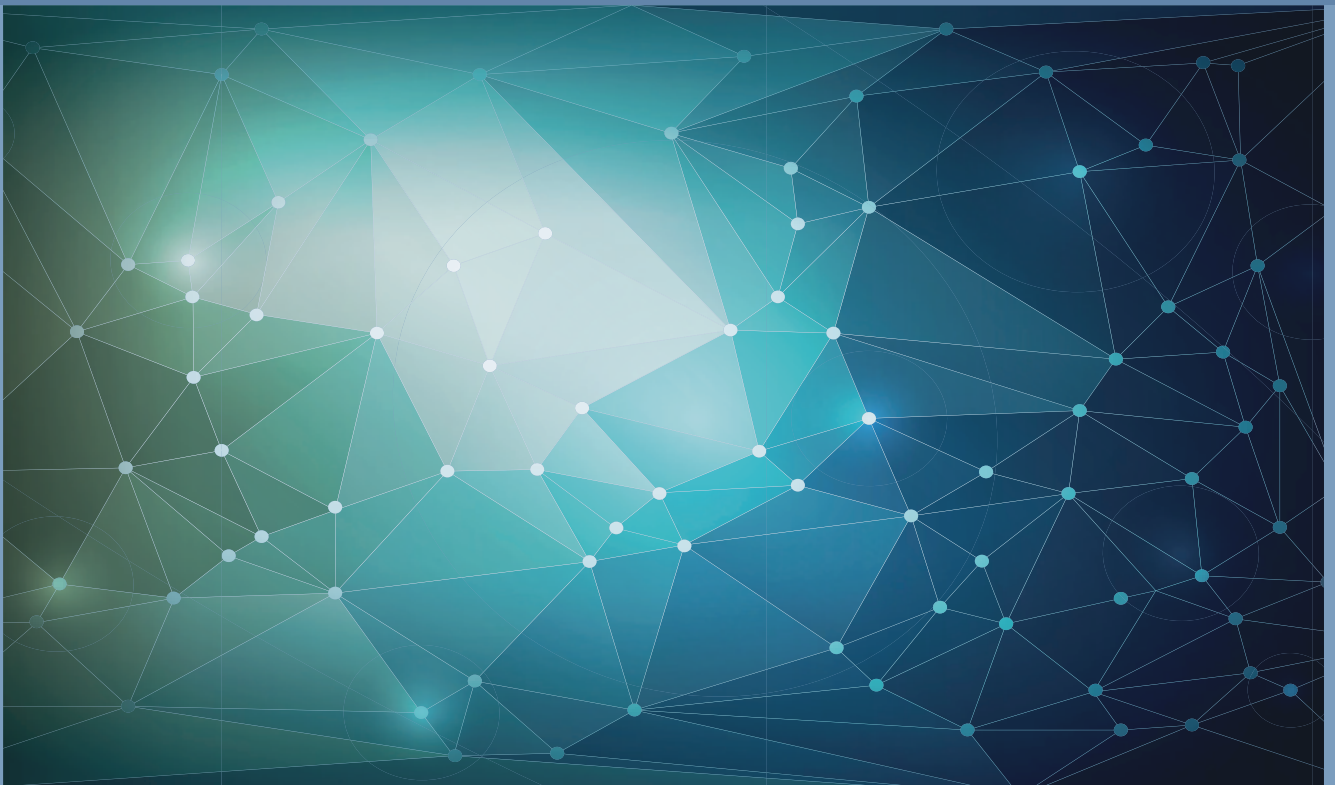

## Special Issue: Festschrift Honoring Otto F. Kernberg, M.D.

Guest Editors: Jill C. Delaney, L.C.S.W., and John F. Clarkin, Ph.D.

AMERICAN  
PSYCHIATRIC  
ASSOCIATION

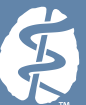

[psychotherapy.psychiatryonline.org](http://psychotherapy.psychiatryonline.org)
